1 **Gut microbiome and its cofactors are linked to**  
2 **lipoprotein distribution profiles**

3  
4 Josué L. Castro-Mejía <sup>1\*</sup>, Bekzod Khakimov<sup>1</sup>, Mads V. Lind<sup>2</sup>, Eva Garne<sup>1,3</sup>, Petronela  
5 Paulová<sup>1,4</sup>, Elnaz Tavakkoli<sup>5</sup>, Lars H. Hansen<sup>6</sup>, Age K. Smilde<sup>1,5</sup>, Lars Holm<sup>3,7</sup>, Søren B.  
6 Engelsen<sup>1</sup>, Dennis S. Nielsen<sup>1\*</sup>

7  
8 <sup>1</sup> Department of Food Science, University of Copenhagen, 1958 Frederiksberg C, Denmark

9 <sup>2</sup> Department of Nutrition, Exercise and Sports, University of Copenhagen, 1958  
10 Frederiksberg C, Denmark

11 <sup>3</sup> Department of Biomedical Sciences, University of Copenhagen, 2200 Copenhagen N,  
12 Denmark

13 <sup>4</sup> Institute of Experimental Endocrinology, Biomedical Research Center, University Science  
14 Park for Biomedicine, Dúbravská cesta 9, 94505, Bratislava, Slovakia.

15 <sup>5</sup> Swammerdam Institute for Life Sciences, University of Amsterdam, Postbus 94215,  
16 Amsterdam 1090 GE, The Netherlands

17 <sup>6</sup> Department of Plant and Environmental Sciences, University of Copenhagen, 1871  
18 Frederiksberg C, Denmark

19 <sup>7</sup> School of Sport, Exercise and Rehabilitation Sciences, University of Birmingham,  
20 Birmingham, B15 2TT, United Kingdom

21

22

23

24 \* Corresponding author(s):

25 Josué L. Castro-Mejía ([jcame@food.ku.dk](mailto:jcame@food.ku.dk)) and Dennis S. Nielsen ([dn@food.ku.dk](mailto:dn@food.ku.dk))

26 Rolighedsvej 26, Department of Food Science, University of Copenhagen, 1958

27 Frederiksberg C, Denmark

28

29

30

31

## 32 **Abstract**

33           Increasing evidence indicates that the gut microbiome (GM) plays an important role  
34 in the etiology of dyslipidemia. To date, however, no in-depth characterization of the  
35 associations between GM and its metabolic attributes with deep profiling of lipoproteins  
36 distributions (LPD) among healthy individuals has been conducted. To determine associations  
37 and contributions of GM composition and its cofactors with distribution profiles of  
38 lipoprotein subfractions, we studied blood plasma LPD, fecal short-chain fatty acids (SCFA)  
39 and GM of 262 healthy Danish subjects aged 19-89 years.

40           Stratification of LPD segregated subjects into three clusters of profiles that reflected  
41 differences in the lipoprotein subclasses, corresponded well with limits of recommended  
42 levels of main lipoprotein fractions and were largely explained by host characteristics such as  
43 age and body mass index. Higher levels of HDL, particularly driven by large subfractions  
44 (HDL2a and HDL2b), were associated with a higher relative abundance of Ruminococcaceae  
45 and Christensenellaceae. Increasing levels of total cholesterol and LDL, which were primarily  
46 associated with large 1 and 2 subclasses, were positively associated with Lachnospiraceae and  
47 Coriobacteriaceae, and negatively with Bacteroidaceae and Bifidobacteriaceae. Metagenome  
48 sequencing showed a higher abundance of genes involved in the biosynthesis of multiple B-  
49 vitamins and SCFA metabolism among subjects with healthier LPD profiles. Metagenomic  
50 assembled genomes (MAGs) affiliated mainly to Eggerthellaceae and Clostridiales were  
51 identified as the contributors of these genes and whose relative abundance correlated  
52 positively with larger subfractions of HDL.

53           The results of this study demonstrate that remarkable differences in composition and  
54 metabolic traits of the GM are associated with variations in LPD among healthy subjects.  
55 Findings from this study provide evidence for GM considerations in future research aiming to  
56 shade light on mechanisms of the GM – dyslipidemia axis.

57

58 **Keywords:** gut microbiome, SCFAs, lipoproteins distribution, HDL, <sup>1</sup>H NMR

## 59 INTRODUCTION

60 Cholesterol is essential for keeping cellular integrity and is an important precursor for  
61 steroid hormones and bile acids <sup>1</sup>. However, alterations of the cholesterol metabolism and  
62 consequent dyslipidemia have been associated with various diseases, including  
63 atherosclerosis and cardiovascular diseases (CVD) <sup>2</sup>, as well as breast cancer <sup>3</sup>.

64 Recent advances in metabolomics research have allowed large-scale and high-  
65 throughput profiling of lipoprotein distribution's (LPD) in human blood plasma based upon  
66 their composition and concentration <sup>4-6</sup>. It has been hypothesized that numerous medical  
67 conditions such as glucose intolerance, type-2 diabetes, myocardial infarction, ischemic  
68 stroke and intracerebral hemorrhage, might be associated with lower blood levels of larger  
69 HDL particles (e.g. HDL2a and HDL2b) and a higher content of triglycerides within the  
70 lipoproteins particles <sup>7,8</sup>.

71 During the last decade it has been shown that alterations in gut microbiome (GM)  
72 composition contribute to the development and progression of several metabolic and  
73 immunological complications <sup>9</sup>. Furthermore, a handful of recent studies on different cohorts  
74 have also demonstrated that the changes in intestinal microbiota are highly correlated to  
75 variations in levels of lipoproteins in blood <sup>10-12</sup>, as well as to promote atherosclerosis <sup>13</sup>, and  
76 regulate cholesterol homeostasis <sup>14</sup>.

77 The relationship between GM and LPD has only been scarcely investigated. Recently  
78 Vojinovic et al. <sup>5</sup> reported the association of up to 32 GM members with very-low-density  
79 (VLDL) and high-density (HDL) subfractions. Positive correlations between a number of  
80 Clostridiales members with large particle size subfractions of HDL were elucidated. In other  
81 studies, focusing on total lipoproteins fractions, an increasing abundance of GM members  
82 affiliated to the Erysipelotrichaceae and Lachnospiraceae families have been linked to  
83 elevated levels of total cholesterol and low-density lipoproteins (LDL) <sup>10-12</sup>. Interestingly,  
84 common gut microbes like Lactobacillaceae members have been reported to assimilate and  
85 lower cholesterol concentrations from growth media and incorporate it into their cellular

86 membrane <sup>15</sup>, whereas butyrate-producing *Roseburia intestinalis* has been found to increase  
87 fatty acid utilization and reduce atherosclerosis development in a murine model <sup>16</sup>.

88 However, the relationship between GM and LPD distribution is still far from being  
89 understood. Thus, with the aim of gaining a deeper understanding of the relationship between  
90 GM and LPD in blood, we carried out a detailed compositional analysis of GM, its metabolic  
91 functions, and studied its associations with blood lipoproteins quantified using a recently  
92 developed method based on proton (<sup>1</sup>H) nuclear magnetic resonance (NMR) spectroscopy <sup>6</sup>.  
93 We determined covariations between larger HDL subclasses and lower total cholesterol with  
94 a several Clostridiales (Ruminococcaceae and Lachnospiraceae) and Eggerthelalles members,  
95 whose metabolic potential is linked to biosynthesis of cofactors essential for carrying out lipid  
96 metabolism.

## 97 **METHODS**

### 98 **Study participants**

99 Two hundred and sixty-two men and women participants older than 20 years, who  
100 had not received antibiotic treatment 3 months prior to the beginning of the study and who  
101 had not received pre- or probiotics 1 month prior to the beginning of the study, were included  
102 as part of the COUNTERSTRIKE (COUNTERacting Sarcopenia with proTeins and exeRcise  
103 – Screening the CALM cohort for Iipoprotein biomarKErs) project ([counterstrike.ku.dk](http://counterstrike.ku.dk)).  
104 Pregnant and lactating women, as well as individuals suffering from CVD, diabetes or  
105 chronic gastrointestinal disorders, were excluded from the study.

106

### 107 **Ethics approval and consent to participate**

108 The study was approved by the Research Ethics Committees of the Capital Region of  
109 Denmark in accordance with the Helsinki Declaration (H-15008313) and the Danish Data

110 Protection Agency (2013-54-0522). Written informed consent was obtained from all  
111 participants.

112

### 113 **Lipoprotein distribution profiles**

114 The human blood plasma lipoproteins were quantified using SigMa LP software <sup>17</sup>.

115 The SigMa LP quantifies lipoproteins from blood plasma or serum using optimized partial  
116 least squares (PLS) regression models developed for each lipoprotein variable using one-  
117 dimensional (1D) <sup>1</sup>H NMR spectra of blood plasma or serum and ultracentrifugation based  
118 quantified lipoproteins as response variables as determined in Khakimov et al. <sup>6</sup>.

119

### 120 **Short chain fatty acids (SCFAs) quantification**

121 Targeted analysis and quantification of SCFA on fecal slurries were carried out as recently  
122 described <sup>18</sup>

123

### 124 **Samples processing, library preparation and DNA sequencing**

125 Fecal samples were collected and kept at 4°C for maximum 48 h after voidance and  
126 stored at -60°C until further use. Extraction of genomic DNA and library preparation for  
127 high-throughput sequencing of the V3-region of the 16S rRNA gene was performed as  
128 previously described <sup>18</sup>. Shotgun metagenome libraries for sequencing of genome DNA were  
129 built using the Nextera XT DNA Library Preparation Kit (Cat. No. FC-131-1096) and  
130 sequenced with Illumina HiSeq 4000 by NXT-DX.

131

### 132 **Analysis of sequencing data**

133 The raw dataset containing pair-end amplicon reads we analyzed following recently  
134 described procedures <sup>18</sup>. The metabolic potential of the amplicon sequencing dataset was  
135 determined through PICRUST <sup>19</sup>, briefly, zero-radius operational taxonomical units (zOTUs)

136 abundances were first normalized by copy number and then KEGG orthologues was obtained  
137 by predicted metagenome function.

138 For shotgun sequencing, the reads were trimmed from adaptors and barcodes and the  
139 high-quality sequences (>99% quality score) using Trimmomatic v0.35<sup>20</sup> with a minimum  
140 size of 50nt were retained. Subsequently, sequences were dereplicated and check for the  
141 presence of Phix179 using USEARCH v10<sup>21</sup>, as well as human and plant genomes associated  
142 DNA using Kraken2<sup>22</sup>. High-quality reads were then subjected to within-sample *de-novo*  
143 assembly-only using Spades v3.13.1<sup>23</sup> and the contigs with a minimum length of 2,000 nt  
144 were retained. Within-sample binning was performed with metaWRAP<sup>24</sup> using Metabat1<sup>25</sup>,  
145 Metabat2<sup>26</sup> and MaxBin2<sup>27</sup>, and bin-refinement<sup>28</sup> was allowed to a  $\leq 10\%$  contamination and  
146  $\geq 70\%$  completeness. Average nucleotide identity (ANI) of metagenome bins, or metagenome  
147 assembled genomes (MAGs), was calculated with fastANI<sup>29</sup> and distances between MAGs  
148 were summarized with bactaxR<sup>30</sup>. To determined abundance across samples, reads were  
149 mapped against MAGs with Subread aligner<sup>31</sup> and a contingency-table of reads per Kbp of  
150 contig sequence per million reads sample (RPKM) was generated. Taxonomic annotation of  
151 MAGs was determined as follows: ORF calling and gene predictions were performed with  
152 Prodigal<sup>32</sup>, the predicted proteins were blasted (blastp) against NCBI NR bacterial and  
153 archaeal protein database. Using Basic Sequence Taxonomy Annotation tool (BASTA)<sup>33</sup>, the  
154 Lowest Common Ancestor (LCA) for every MAG was estimated based on percentage of hits  
155 of LCA of 60, minimum identity of 0.7, minimum alignment of 0.7 and a minimum number  
156 of hits for LCA of 10.

157 To determine the metabolic potential of metagenomes, ORF calling and gene  
158 predictions (similar as above) were performed on both, binned and unbinned contigs, and the  
159 predicted proteins were subsequently clustered at 90% similarity using USEARCH v10. To  
160 assign functions, protein sequences were blasted (90% id and 90% cover query) against the  
161 integrated reference catalog of the human gut microbiome (IRCHGM)<sup>34</sup>, while using only  
162 target sequences containing KEGG ortholog entries. Similar as above, to determine

163 abundance of protein-encoding genes across metagenomes, reads were mapped against  
164 protein clusters (PC) with DIAMOND<sup>35</sup> and a contingency-table of reads mapped to PCs was  
165 also generated. To avoid bias due to sequencing depth across protein-encoding genes, samples  
166 were subsampled to 15,000,000 reads per sample.

167

### 168 **Statistical analysis**

169 Stratification and clustering of LPD was carried out using Euclidean distances and  
170 general agglomerative hierarchical clustering procedure based on “Ward2”, as implemented  
171 in the *gplots* R-package<sup>36</sup>. For univariate data analyses, pairwise comparisons were carried  
172 out with unpaired two-tailed Student’s *t*-test, Spearman’s rank coefficient was used for  
173 determining correlations and Chi-Square test for evaluating group distributions. For  
174 multivariate data analyses, the association of covariates (e.g. age, BMI, sex) with LPD were  
175 assessed by redundancy analysis (RDA) (999 permutations), whereas the association of LPD  
176 clusters with GM were analyzed by distance-based RDA (999 permutations) on Canberra  
177 distances (implemented in the *vegan* R-package<sup>37</sup>).

178 Feature selection for zOTUs was performed with Random Forest. Briefly, for a given  
179 training set (training: 70%, test: 30%), the *party* R-package<sup>38</sup> was run for feature selection  
180 using unbiased-trees (*cforest\_unbiased* with 6,000 trees and variable importance with 999  
181 permutations) and subsequently the selected variables were used to predict (6,000 trees with  
182 999 permutations) their corresponding test set using *randomForest* R-package<sup>39</sup>. The selected  
183 features were subjected to sequential rounds of feature selection until prediction could no  
184 longer be improved. All statistical analyses were performed in R versions  $\leq 3.6.0$ .

185

### 186 **Data availability**

187 Sequence data are available at the Sequence Read Archive (SRA), BioProject  
188 SUB9304449 submissions SUB9305011 and SUB9304442. Supplementary Table 1 provides

189 samples information. Non-sequence data that support the findings of this study are available  
190 from the corresponding authors upon reasonable request.

## 191 **RESULTS**

### 192 **Participants and data collection**

193 Two hundred and sixty two individuals (men:women 90:172) with an age between 20  
194 and 85 years (Figure 1A) and BMI ranging between 19 and 37 kg/m<sup>2</sup> (Figure 1B) were  
195 included in this study. Subjects are representatives of community dwelling and apparently  
196 healthy adults living in the Danish Capital Region. In this study, we included <sup>1</sup>H NMR  
197 spectroscopy based quantified lipoproteins from human blood plasma<sup>6</sup>, short-chain fatty  
198 acids profiling and GM composition on fecal samples based on 16S rRNA-gene amplicon  
199 sequencing and shotgun metagenome sequencing for a subset of samples (Figure 1C).

200

### 201 **LPD profiles, stratification and host covariates**

202 LPD profiles of the study subjects were predicted from <sup>1</sup>H NMR measurements of  
203 blood plasma. A total of 55 lipoproteins-subfractions were quantified including cholesterol,  
204 triglycerides (TG), cholesterol ester (CE), free cholesterol, phospholipids, apolipoprotein A  
205 (ApoA1) and apolipoprotein B (ApoB) content in all or in some of lipoprotein in plasma  
206 (VLDL, IDL, HDL, LDL) and/or in lipoprotein subfractions (HDL2a, HDL2b, HDL3, LDL1,  
207 LDL2, LDL3, LDL4, LDL5, LDL6)<sup>6</sup>. Linking host covariates and LPD profiles, redundancy  
208 analysis (RDA) of LPD profiles showed a significant ( $p \leq 0.01$ ) effect of age, BMI and sex on  
209 LPD profiles (Figure 2B) with a combined size effect of up to 24.6% (Figure 2B-C).

210 Clustering of LPD profiles segregated study participants into three groups (Figure  
211 2A, Figure I in the Data Supplement). Cluster 1A and 1B were characterized by higher  
212 concentrations of LDL sub-fractions and their constituents (particularly evident in subclasses  
213 1 and 2). Clusters 1A and 2, on the other hand, were characterized by lower concentrations of



214 HDL sub-fractions (associated with HDL2a and HDL2b), whereas higher concentrations of  
215 HDL-3 particles in subjects of cluster 1A were observed (Figure I in the Data Supplement).  
216 Furthermore, plasma concentrations of CE, phospholipids and CE were higher among cluster  
217 1A and 1B. When comparing the plasma fractions of the study participants to the  
218 recommendations of cholesterol classes provided by the National Institute of Health (NIH) <sup>40</sup>,  
219 for clusters 1A and 1B total cholesterol and LDL levels were above the recommendations,  
220 while for clusters 1B and 2 the levels pf HDL were below the recommended values.

221 LPD profiles were also found to covariate with host attributes, cluster 2 subjects was  
222 significantly younger than clusters 1A and 1B (Figure 2D), and cluster 1B showed the lowest  
223 BMI (Figure 2E). These results were also consistent even after correcting for sex effects,  
224 given that cluster 1B had a significantly higher proportion of women (Fisher test  $p < 0.01$ ,  
225 Figure 2A) compared to clusters 1A and 2 (Figure I in the Data Supplement).

226

### 227 **LPD clusters are linked with GM profiles**

228 The GM of study participants ( $n = 262$ ) was profiled using high-throughput amplicon  
229 sequencing the V3-region of the 16S rRNA gene (11,544 zOTUs), as well as shotgun  
230 metagenome sequencing of total genomic DNA for a subset of samples ( $n = 58$ ). Gene  
231 content and functionality (based on KEGG orthologues - KOs) were predicted based on  
232 PICRUSt <sup>19</sup> (for 16S rRNA gene amplicons), as well as through ORF calling and gene  
233 prediction of assembled contigs reconstructed from shotgun metagenome data. Validation of  
234 PICRUSt against metagenome calling KO yielded a high correlation coefficient (Pearson  $r =$   
235 0.77, Figure 3A) between the gene richness of both datasets. Alpha diversity analyses  
236 between LPD clusters revealed no significant ( $t$ -test  $p > 0.05$ ) differences in phylotypes  
237 (Figure 3B) nor KOs richness as predicted by the PICRUSt (Figure 3C). A significant (Dip-  
238 test  $p < 0.001$ ) bimodal distribution of KO richness among the study participants was  
239 observed, but a higher-/lower- gene count was not associated to LPD clusters (Figure 3C) or  
240 BMI categories (Figure 3D). Significant differences in composition (beta-diversity) between

241 LPD clusters were observed among phylotypes (Canberra distance, Adonis test  $p < 0.05$ ,  $R^2 =$   
242 0.62-1%), but not among PICRUSTs predicted KOs.

243

#### 244 **LPD clusters correspond with GM and KOs features**

245 After feature selection based on random forest, LPD clusters were partially  
246 discriminated (Figure 4A) by 206 selected sequence variants (zOTUs) distributed to over 10  
247 families (Figure 4B). Among these, zOTUs affiliated to Ruminococcaceae (75) and  
248 Lachnospiraceae (58) represented 64%, followed by Bacteroidaceae (8), Bifidobacteriaceae  
249 (7), Christensenellaceae (6), Coriobacteriaceae (5) and four other sparse bacterial families  
250 (47). The cumulative abundance (cumulative sum scaling, CSS) of those families showed  
251 differences between LPD clusters, with cluster 1A being associated with a higher abundance  
252 of Lachnospiraceae and a lower abundance of Christensenellaceae members, while cluster 1B  
253 was characterized by a larger proportion of Ruminococcaceae phylotypes, and cluster 2  
254 showed increased proportion of Bifidobacteriaceae, Bacteroidaceae and reduced abundance of  
255 Coriobacteriaceae (Figure 4B-C).

256 KEGG orthologues predicted through PICRUST demonstrated very weak  
257 discrimination power towards LPD clusters (Figure 4D, Figure II-A in the Data Supplement  
258 shows detailed 3<sup>rd</sup> level KEGG functions), this included 54 KOs affiliated to >9 primary and  
259 secondary metabolism processes, as well as signaling and cellular processes (Figure 4E).  
260 Despite its documented limitations<sup>41</sup> PICRUST was still able to reveal a decreasing  
261 abundance of functional modules among subjects of cluster 1A and 2 as compared to those of  
262 cluster 1B (Figure 4E-F). Analysis on aggregated functions per KOs (2<sup>nd</sup> level KEGG)  
263 showed that cluster 1B was characterized by a higher abundance (t-test  $p < 0.05$ ) of functions  
264 related to metabolism of amino acids (e.g., Phe, Tyr and Trp biosynthesis), carbohydrates  
265 (e.g., pyruvate, propanoate and butanoate metabolism), lipids (glycerolipids and  
266 glycerophospholipids metabolism) and genetic information processing (e.g., transcriptional  
267 factors) (Figure 4F).

268 Correlation analyses of selected zOTUs vs LPD profiles displayed several significant  
269 (Spearman FDR  $p \leq 0.05$ ) associations (Figure 4G, Figure II-B in the Data Supplement).  
270 Most Ruminococcaceae (74/75 phylotypes, mostly unclassified), a division of  
271 Lachnospiraceae (13/58 phylotypes, mostly unclassified), Bacteroidaceae (e.g., *B.*  
272 *massiliensis*, *B. caccae*) Christensenellaceae (unclassified genus) and Coriobacteriaceae  
273 (unclassified genus) showed positive correlations with HDL subfractions and negative  
274 correlations with VLDL and LDL (e.g. LDL3, 4, 5 ,6). Contrary to this, most  
275 Lachnospiraceae (45/58), Veillonellaceae (e.g., *V. invisus*) and Bifidobacteriaceae (e.g., *Bf.*  
276 *adolescentis*, *Bf. bifidum*) phylotypes correlated negatively with HDL subfractions, and  
277 positively with subfractions composed of IDL, LDL and VLDL. For KOs vs LPD (Figure 4H,  
278 Figure II-C in the Data Supplement), increasing abundance of functions linked to  
279 glycerophospholipids metabolism and amino acids (His, Phe, Tyr and Trp) biosynthesis  
280 correlated positively with HDL fractions and negatively with LDL and VLDL. Furthermore,  
281 the production of glycosphingolipids, biotin (Vit<sub>B7</sub>) and lipopolysaccharides correlated  
282 negatively with small LDL subfractions (e.g. LDL3, 4, 5 ,6).

283

#### 284 **Metagenome bins and functions associated with LPD clusters**

285 Fifty-eight samples were subjected to shotgun metagenome sequencing (Figure 1C)  
286 generating on average 5.2 GB per sample. ORF calling on the entire assembled dataset of  
287 generated ~1.4 million gene-clusters (90% similarity clusters, here termed “genes”), with  
288 84,560 core genes being present in at least 90% of the metagenome sequenced samples. RDA  
289 analysis of the core-gene dataset showed significant ( $p = 0.001$ ) differences between LPD  
290 clusters and explaining up to 23.7% of the total variance in gene composition (Figure 5A).  
291 Ranking of variables (i.e. top 150) within the 1<sup>st</sup> and 2<sup>nd</sup> canonical components of the CAP  
292 analyses provided an overview of 35 “known” metabolic genes (>90% identity match to the  
293 integrated non-redundant gene catalog with KEGG ortholog entries <sup>34</sup>, Figure 5B, Figure III-  
294 A in the Data Supplement) linked to >10 2<sup>nd</sup> level KEGG functions, which resembled the

295 large majority of those predicted by PICRUSt (see Figure 4E-F). A higher abundance of these  
296 genes was observed among subjects grouped within Cluster 1B relative to cluster 1A and  
297 Cluster 2. To determine the species associated with these genes, gene-sequences were mapped  
298 back to 1,419 metagenome-assembled genomes (MAGs) (Figure 5C). Sixty MAGs affiliated  
299 to Lachnospiraceae, Clostridiales, Coriobacteriaceae and Firmicutes and clustered within 19  
300 species were found to contribute with 27 out of the 35 genes that discriminated LPD clusters  
301 (Figure 5D, Figure III-B in the Data Supplement). MAGs-G1 to G5 contributed with  
302 peptidoglycan and glycan biosynthesis. MAGs-G6 to G12 contributed with thiamine (Vit<sub>B1</sub>)  
303 and pantothenate (Vit<sub>B5</sub>) metabolism, starch degradation and butyric acid metabolism (butanol  
304 dehydrogenase that may lead to increased concentrations of 1-butanol at the expense of  
305 butyrate production, Figure 5E) and glycerolipid metabolism. Finally, MAGs-G13 to G19  
306 promoted biosynthesis of glucosinates, metabolism of propionic acid, biosynthesis of fatty  
307 acids, Vit<sub>B6</sub> metabolism, as well as folate (Vit<sub>B9</sub>) biosynthesis (Figure 5D, 5F, Figure III-B in  
308 the Data Supplement). Subjects belonging to LPD-cluster 1B had a significantly higher  
309 relative abundance of MAGs-G7, MAGs-G9 to G19 (those comprising Clostridiales,  
310 Eggerthellaceae and Firmicutes bins, Figure 5G-H), MAGs-G1 and MAGs-G5 (those  
311 affiliated to Lachnospiraceae, Figure 5I) than subjects in clusters 1A and 2. Likewise, their  
312 cumulative abundance reached significant positive (spearman  $p < 0.001$ ) correlations with  
313 constituents (e.g., Cholesteryl ester) of larger HDL sub-classes (HDL2a and HDL2b) (Figure  
314 5J).

315 The concentrations of the SCFAs acetate and propionate in fecal samples showed no  
316 differences between LPD clusters. However, higher concentrations of butyrate, isobutyrate, 2-  
317 methylbutyrate, valerate and isovalerate (ANOVA Tukey's HSD  $p < 0.05$ ) were observed in  
318 cluster 2 (Figure 6A-D). To determine whether microbial activity was linked to the  
319 production of such branched-chain fatty-acids, we then focused on analyzing the abundance  
320 of isobutyrate kinase (Figure IV-C in the Data Supplement) and 2-methylbutanoyl-CoA  
321 (Figure 6F) dehydrogenase in the metagenomic samples (Figure 6E-F). For 2-

322 methylbutanoyl-CoA dehydrogenase 86% of the gene-variants were also mapped to those 60  
323 MAGs displayed in Figure 6F (ANOVA Tukey's HSD  $p < 0.05$  for cluster 2 LPD subjects),  
324 but none of these had significant matches to isobutyrate kinase. Isobutyrate kinase was found  
325 in 86 MAGs (Figure IV-A in the Data Supplement) belonging to *Bacteroides*,  
326 Ruminococcaceae, Alistipes, Desulfovibrionaceae and Lachnospiraceae, and whose  
327 cumulative relative abundance varied (Figure IV-B in the Data Supplement) substantially  
328 between LPD clusters.

## 329 Discussion

330 It is well established that certain LPD profiles are associated with elevated CVD risk,  
331 but relatively little is known on the links between GM and LPD. Building on recently  
332 published LPD profiles of 262 adult individuals<sup>6</sup> the present study investigates the  
333 correlations between LPD-profiles and GM, and its genetic functional assignments.

334 Stratification of study participants based on their LPD profiles yielded three LPD  
335 clusters (1A, 1B and 2) that corresponded well with within- and outside- suggested levels of  
336 total cholesterol, triglycerides, LDL, HDL and VLDL as those recommended by the NIH<sup>40</sup>  
337 and as shown in Figure 2A. Our study demonstrates that lower levels of total HDL are  
338 associated with a decrease in the concentration of large subfractions (e.g. HDL2a and  
339 HDL2b), while higher levels of LDL correspond with an increase in the concentration of  
340 large LDL subfractions (e.g. LDL1). Similarly, high levels of cholesterol corresponded with  
341 high levels of circulating levels of VLDL. As confirmed by our results and others, the LPD  
342 profiles are influenced by host factors like age, sex and BMI<sup>5,10</sup>. These components are able  
343 to explain up to 25% of the total variance in the LPD. To the best of our knowledge, this  
344 study represents the first to show the contribution of LPD subfractions to the collective levels  
345 of cholesterol, cholesterol-types and triglycerides, as well as recommendations among an age-  
346 /BMI- diverse group of apparently healthy adults.

347           Increasing evidence supports the role of GM to modulate lipids homeostasis and  
348 development of dyslipidemia <sup>16,42–44</sup>. GM profiling did not show major differences in the  
349 number of sequence-variants and gene-richness counts among subjects with remarkably  
350 distinct LPD profiles (e.g., C1A, C1B and C2 clusters). Despite the fact that a bimodal  
351 distribution of gene-richness counts was reproduced as in previous studies <sup>45,46</sup> no significant  
352 differences in the gene-frequencies between normal and overweight participants were  
353 observed.

354           Beta diversity analyses showed significant differences that discriminated LPD  
355 clusters (e.g., Figure 4A). Lachnospiraceae members correlated positively with small LDL  
356 particles (e.g., LDL3, LDL4 and LDL5), ILDL and VLDL, while Ruminococcaceae, a  
357 subgroup of Lachnospiraceae phylotypes and other less abundant families showed positive  
358 correlations with large particles of HDL (HDL2a and HDL2b (see e.g., Figure 4G)).  
359 Moreover, in agreement with our findings, a recent large-scale study published by Vojinovic  
360 et al. <sup>5</sup> also reported that Lachnospiraceae and Ruminococcaceae members were related to the  
361 HDL/LDL ratios. High HDL levels have been consistently correlated to a low risk of  
362 developing CVD <sup>7,8</sup> and recent evidence support that the heterogeneity of HDL display  
363 different associations with the incidence of CVD and metabolic syndrome <sup>7,47,48</sup>. Recent  
364 findings suggest that *Akkermansia muciniphila* induces expression of low-density lipoprotein  
365 receptors and ApoE in the hepatocytes, facilitating the clearance of triglyceride-rich  
366 lipoprotein remnants, chylomicron remnants, and intermediate-density lipoproteins, from  
367 circulation <sup>42</sup>. In line with this, our study elucidates a possible link between dyslipidemia and  
368 the metabolic potential of MAGs for biosynthesizing important bioactive compounds such as  
369 vitamin B complex and peptidoglycans, as well as SCFA metabolism. Among these  
370 compounds, pantothenate (Vit<sub>B5</sub>), Vit<sub>B6</sub> and folate (Vit<sub>B9</sub>) have been inversely associated with  
371 low-grade inflammation <sup>49</sup> and mortality risk of CVD in a mechanism that may involve  
372 regulation of blood homocysteine concentrations <sup>50</sup> and one-carbon metabolism <sup>51</sup>. SCFA like  
373 butyrate and valerate have been shown to decrease total cholesterol and the expression of

374 mRNA associated with fatty acid synthase and sterol regulatory element binding protein 1c,  
375 to enhance mRNA expression of carnitine palmitoyltransferase-1 $\alpha$  (CPT-1 $\alpha$ ) in liver <sup>52,53</sup>, as  
376 well as to ameliorate arteriosclerosis via ABCA1-mediated cholesterol efflux in macrophages  
377 <sup>54</sup>. Biosynthesis of peptidoglycans by some GM members has been associated with incidence  
378 of stenotic atherosclerotic plaques and insulin resistance <sup>55,56</sup>. However, emerging evidence  
379 suggests that these potent signaling molecules play positive roles for enhancing systemic  
380 innate immunity <sup>57</sup> and neurodevelopmental processes <sup>58</sup>, relaying on a species-dependent  
381 fashion <sup>59</sup>. In conclusion, our study provides evidence that GM members (e.g., MAGs) and  
382 their genes related to the biosynthesis of bioactive molecules needed to carry out lipid  
383 metabolism, e.g., vitamin B complex and S/B-CFA, are more abundant among subjects with  
384 healthier LPD profiles (e.g., higher HDL2a, HDL2b, and lower LDL). Furthermore,  
385 variations in LPD subfractions correlates with differences in the GM composition <sup>5</sup>, but these  
386 are not necessarily associated to a higher or lower microbial diversity as reported in previous  
387 studies <sup>45,46</sup>. Given the cross-sectional nature of our study and its inherent limitations, it is not  
388 possible to depict the mechanism by which GM may influence variability in LPD  
389 subfractions. However, our results provide evidence for GM considerations in future research  
390 aiming at unravelling the processes of LPD particles assembly through longitudinal  
391 mechanistic approaches that include the activity of enzymes and transfer proteins, membrane  
392 modulators <sup>60</sup> and integrative multi-omics.

393

394

## 395 **ARTICLE INFORMATION**

### 396 **Affiliations**

397 Department of Food Science, University of Copenhagen (JLC, BK, EG, PP, SBE, DSN).

398 Department of Nutrition, Exercise and Sports, University of Copenhagen (MVL). Department

399 of Biomedical Sciences, University of Copenhagen (EG, LH). Institute of Experimental  
400 Endocrinology, Biomedical Research Center, University Science Park for Biomedicine,  
401 Slovakia (PP). Swammerdam Institute for Life Sciences, University of Amsterdam (ET, AS).  
402 Department of Plant and Environmental Sciences, University of Copenhagen (LHH). School  
403 of Sport, Exercise and Rehabilitation Sciences, University of Birmingham (LH).

404

#### 405 **Source of Funding**

406 The present study received funding from the Innovation Foundation Denmark  
407 through the COUNTERSTRIKE project (4105-00015B).

408

#### 409 **Disclosures**

410 None.

411

#### 412 **Supplemental Materials**

413 Data Supplement Figures I – IV

414 Supplementary-table\_1

415

416

417

418

419

420

421

422

423

424

425



426

427

428

## 429 **References**

- 430 1. Zhang H, Temel RE, Martel C. Cholesterol and lipoprotein metabolism: Early career  
431 committee contribution. *Arterioscler Thromb Vasc Biol* 2014;34:1791–1794.  
432 doi:10.1161/ATVBAHA.114.304267.
- 433 2. Vallejo-Vaz AJ, Robertson M, Catapano AL, Watts GF, Kastelein JJ, Packard CJ, Ford I, Ray  
434 KK. Low-Density Lipoprotein Cholesterol Lowering for the Primary Prevention of  
435 Cardiovascular Disease Among Men With Primary Elevations of Low-Density Lipoprotein  
436 Cholesterol Levels of 190 mg/dL or Above: Analyses From the WOSCOPS (West of Scotland  
437 Coronary Prevention Study) 5-Year Randomized Trial and 20-Year Observational Follow-Up.  
438 *Circulation* 2017;136:1878–1891. doi:10.1161/CIRCULATIONAHA.117.027966.
- 439 3. Nelson ER, Chang C yi, McDonnell DP. Cholesterol and breast cancer pathophysiology.  
440 *Trends Endocrinol Metab* 2014;25:649–655. doi:10.1016/j.tem.2014.10.001.
- 441 4. Aru V, Lam C, Khakimov B, et al. Quantification of lipoprotein profiles by nuclear magnetic  
442 resonance spectroscopy and multivariate data analysis. *TrAC - Trends Anal Chem*  
443 2017;94:210–219. doi:10.1016/j.trac.2017.07.009.
- 444 5. Vojinovic D, Radjabzadeh D, Kurilshikov A, et al. Relationship between gut microbiota and  
445 circulating metabolites in population-based cohorts. *Nat Commun* 2019;10:5813.  
446 doi:10.1038/s41467-019-13721-1.
- 447 6. Khakimov B, Hoefsloot HCJ, Mobaraki N, et al. Human blood lipoprotein predictions from 1  
448 H NMR spectra: protocol, model performances and cage of covariance. *BioRxiv*  
449 2021.02.24.432509. doi: <https://doi.org/10.1101/2021.02.24.432509>
- 450 7. Holmes M V., Millwood IY, Kartsonaki C, et al. Lipids, Lipoproteins, and Metabolites and  
451 Risk of Myocardial Infarction and Stroke. *J Am Coll Cardiol* 2018;71:620–632.  
452 doi:10.1016/j.jacc.2017.12.006.
- 453 8. Wang J, Stančáková A, Soinen P, Kangas AJ, Paananen J, Kuusisto J, Ala-Korpela M,  
454 Laakso M. Lipoprotein subclass profiles in individuals with varying degrees of glucose  
455 tolerance: A population-based study of 9399 Finnish men. *J Intern Med* 2012;272:562–572.  
456 doi:10.1111/j.1365-2796.2012.02562.x.
- 457 9. Zheng D, Liwinski T, Elinav E. Interaction between microbiota and immunity in health and  
458 disease. *Cell Res* 2020;30:492–506. doi:10.1038/s41422-020-0332-7.
- 459 10. Fu J, Bonder MJ, Cenit MC, et al. The gut microbiome contributes to a substantial proportion  
460 of the variation in blood lipids. *Circ Res* 2015;117:817–824.

- 461 doi:10.1161/CIRCRESAHA.115.306807.
- 462 11. Falony G, Joossens M, Vieira-Silva S, et al. Population-level analysis of gut microbiome  
463 variation. *Science* 2016;352:560–564. doi:10.1126/science.aad3503.
- 464 12. Rothschild D, Weissbrod O, Barkan E, et al. Environment dominates over host genetics in  
465 shaping human gut microbiota. *Nature* 2018;555:210–215. doi:10.1038/nature25973.
- 466 13. Koeth RA, Wang Z, Levison BS, et al. Intestinal microbiota metabolism of l-carnitine, a  
467 nutrient in red meat, promotes atherosclerosis. *Nat Med* 2013;19:576–585.  
468 doi:10.1038/nm.3145.
- 469 14. Le Roy T, Lécuyer E, Chassaing B, et al. The intestinal microbiota regulates host cholesterol  
470 homeostasis. *BMC Biol* 2019;17:94. doi:10.1186/s12915-019-0715-8.
- 471 15. Liong MT, Shah NP. Acid and bile tolerance and cholesterol removal ability of lactobacilli  
472 strains. *J Dairy Sci* 2005;88:55–66. doi:10.3168/jds.S0022-0302(05)72662-X.
- 473 16. Kasahara K, Krautkramer KA, Org E, et al. Interactions between *Roseburia intestinalis* and diet  
474 modulate atherogenesis in a murine model. *Nat Microbiol* 2018;3:1461–1471.  
475 doi:10.1038/s41564-018-0272-x.
- 476 17. Khakimov B, Mobaraki N, Trimigno A, Aru V, Engelsen SB. Signature Mapping (SigMa): An  
477 efficient approach for processing complex human urine <sup>1</sup>H NMR metabolomics data. *Anal*  
478 *Chim Acta* 2020;1108:142–151. doi:10.1016/j.aca.2020.02.025.
- 479 18. Castro-Mejía JL, Khakimov B, Krych Ł, et al. Physical fitness in community-dwelling older  
480 adults is linked to dietary intake, gut microbiota, and metabolomic signatures. *Aging Cell*  
481 2020;19:e13105.
- 482 19. Langille MGI, Zaneveld J, Caporaso JG, et al. Predictive functional profiling of microbial  
483 communities using 16S rRNA marker gene sequences. *Nat Biotechnol* 2013;31:814–821.  
484 doi:10.1038/nbt.2676.
- 485 20. Bolger AM, Lohse M, Usadel B. Trimmomatic: A flexible trimmer for Illumina sequence data.  
486 *Bioinformatics* 2014;30:2114–2120. doi:10.1093/bioinformatics/btu170.
- 487 21. Edgar R. UNOISE2: improved error-correction for Illumina 16S and ITS amplicon sequencing.  
488 *BioRxiv* 2016:081257. doi:10.1101/081257.
- 489 22. Wood DE, Lu J, Langmead B. Improved metagenomic analysis with Kraken 2. *Genome Biol*  
490 2019;20:257. doi:10.1186/s13059-019-1891-0.
- 491 23. Bankevich A, Nurk S, Antipov D, et al. SPAdes: A new genome assembly algorithm and its  
492 applications to single-cell sequencing. *J Comput Biol* 2012;19:455–477.  
493 doi:10.1089/cmb.2012.0021.
- 494 24. Uritskiy G V., Diruggiero J, Taylor J. MetaWRAP - A flexible pipeline for genome-resolved  
495 metagenomic data analysis. *Microbiome* 2018;6:158. doi:10.1186/s40168-018-0541-1.
- 496 25. Kang DD, Froula J, Egan R, Wang Z. MetaBAT, an efficient tool for accurately reconstructing  
497 single genomes from complex microbial communities. *PeerJ* 2015;3:e1165.  
498 doi:10.7717/peerj.1165.
- 499 26. Kang DD, Li F, Kirton E, Thomas A, Egan R, An H, Wang Zhong. MetaBAT 2: An adaptive

- 500 binning algorithm for robust and efficient genome reconstruction from metagenome  
501 assemblies. *PeerJ* 2019; 7:e7359. doi:10.7717/peerj.7359.
- 502 27. Wu Y-W, Tang Y-H, Tringe SG, Simmons BA, Singer SW. MaxBin: an automated binning  
503 method to recover individual genomes from metagenomes using. *Microbiome* 2014;2:26.  
504 doi.org/10.1186/2049-2618-2-26
- 505 28. Song WZ, Thomas T. Binning-refiner: Improving genome bins through the combination of  
506 different binning programs. *Bioinformatics* 2017;33:1873–1875.  
507 doi:10.1093/bioinformatics/btx086.
- 508 29. Jain C, Rodriguez-R LM, Phillippy AM, Konstantinidis KT, Aluru S. High throughput ANI  
509 analysis of 90K prokaryotic genomes reveals clear species boundaries. *Nat Commun*  
510 2018;9:5114. doi:10.1038/s41467-018-07641-9.
- 511 30. Carroll LM, Wiedmann M, Kovac J. Proposal of a taxonomic nomenclature for the bacillus  
512 cereus group which reconciles genomic definitions of bacterial species with clinical and  
513 industrial phenotypes. *MBio* 2020;11: e00034-20. doi:10.1128/mBio.00034-20.
- 514 31. Liao Y, Smyth GK, Shi W. The Subread aligner: Fast, accurate and scalable read mapping by  
515 seed-and-vote. *Nucleic Acids Res* 2013;e108. doi:10.1093/nar/gkt214.
- 516 32. Hyatt D, Chen GL, LoCascio PF, Land ML, Larimer FW, Hauser LJ. Prodigal: Prokaryotic  
517 gene recognition and translation initiation site identification. *BMC Bioinformatics*  
518 2010;11:119. doi:10.1186/1471-2105-11-119.
- 519 33. Kahlke T, Ralph PJ. BASTA – Taxonomic classification of sequences and sequence bins using  
520 last common ancestor estimations. *Methods Ecol Evol* 2019;10:100–103. doi:10.1111/2041-  
521 210X.13095.
- 522 34. Li J, Wang J, Jia H, et al. An integrated catalog of reference genes in the human gut  
523 microbiome. *Nat Biotechnol* 2014;32:834–841. doi:10.1038/nbt.2942.
- 524 35. Buchfink B, Xie C, Huson DH. Fast and sensitive protein alignment using DIAMOND. *Nat*  
525 *Methods* 2015;12:59–60. doi:10.1038/nmeth.3176.
- 526 36. Warnes G, Bolker B, Bonebakker L, et al. *gplots*. R Packag 2020
- 527 37. Oksanen AJ, Blanchet FG, Kindt R, et al. *vegan*: Community Ecology Package. R Packag  
528 2015.
- 529 38. Hothorn T, Hornik K, Strobl C, Zeileis A. *Party*: a laboratory for recursive partytioning. R  
530 Packag 2016.
- 531 39. Liaw A, Wiener M. *Classification and Regression by randomFores*. R Packag 2014.
- 532 40. National Insititute of Health (NIH). *Detection, Evaluation, and Treatment of High Blood*  
533 *Cholesterol in Adults (Adult Treatment Panel III)*. NIH Publication 2002; 02-5215.
- 534 41. Sun S, Jones RB, Fodor AA. Inference-based accuracy of metagenome prediction tools varies  
535 across sample types and functional categories. *Microbiome* 2020;8:46. doi:10.1186/s40168-  
536 020-00815-y.
- 537 42. Shen J, Tong X, Sud N, Khound R, Song Y, Maldonado-Gomez MX, Walter J, Su Q, et al.  
538 *Low-Density Lipoprotein Receptor Signaling Mediates the Triglyceride-Lowering Action of*

- 539 Akkermansia muciniphila in Genetic-Induced Hyperlipidemia. *Arterioscler Thromb Vasc Biol*  
540 2016;36:1448–1456. doi:10.1161/ATVBAHA.116.307597.
- 541 43. Kiouptsi K, Jäckel S, Pontarollo G, et al. The microbiota promotes arterial thrombosis in low-  
542 density lipoprotein receptor-deficient mice. *MBio* 2019;10: e02298-19.  
543 doi:10.1128/mBio.02298-19.
- 544 44. Rune I, Rolin B, Larsen C, et al. Modulating the gut microbiota improves glucose tolerance,  
545 lipoprotein profile and atherosclerotic plaque development in ApoE-deficient mice. *PLoS One*  
546 2016;11: e0146439. doi:10.1371/journal.pone.0146439.
- 547 45. Le Chatelier E, Nielsen T, Qin J, et al. Richness of human gut microbiome correlates with  
548 metabolic markers. *Nature* 2013;500:541–546. doi:10.1038/nature12506.
- 549 46. Cotillard A, Kennedy SP, Kong LC, et al. Dietary intervention impact on gut microbial gene  
550 richness. *Nature* 2013;500:585–588. doi:10.1038/nature12480.
- 551 47. Kontush A. HDL particle number and size as predictors of cardiovascular disease. *Front*  
552 *Pharmacol* 2015;6:218. doi:10.3389/fphar.2015.00218.
- 553 48. Camont L, Chapman MJ, Kontush A. Biological activities of HDL subpopulations and their  
554 relevance to cardiovascular disease. *Trends Mol Med* 2011;17:594–603.  
555 doi:10.1016/j.molmed.2011.05.013.
- 556 49. Jung S, Kim MK, Choi BY. The long-term relationship between dietary pantothenic acid  
557 (vitamin B5) intake and C-reactive protein concentration in adults aged 40 years and older.  
558 *Nutr Metab Cardiovasc Dis* 2017;27:806–816. doi:10.1016/j.numecd.2017.05.008.
- 559 50. Cui R, Iso H, Date C, Kikuchi S, Tamakoshi A. Dietary folate and vitamin B6 and B12 intake  
560 in relation to mortality from cardiovascular diseases: Japan collaborative cohort study. *Stroke*  
561 2010;41:1285–1289. doi:10.1161/STROKEAHA.110.578906.
- 562 51. Walker AK, Jacobs RL, Watts JL, et al. A Conserved SREBP-1/Phosphatidylcholine Feedback  
563 Circuit Regulates Lipogenesis in Metazoans. *Cell* 2011;147:840–852.  
564 doi:10.1016/j.cell.2011.09.045.
- 565 52. Nguyen TD, Prykhodko O, Fåk Hällenius F, Nyman M. Monovalerin and trivalerin increase  
566 brain acetic acid, decrease liver succinic acid, and alter gut microbiota in rats fed high-fat diets.  
567 *Eur J Nutr* 2019;58:1545–1560. doi:10.1007/s00394-018-1688-z.
- 568 53. Jiao AR, Diao H, Yu B, et al. Oral administration of short chain fatty acids could attenuate fat  
569 deposition of pigs. *PLoS One* 2018;13: e0196867. doi:10.1371/journal.pone.0196867.
- 570 54. Du Y, Li X, Su C, Xi M, Zhang X, Jiang Z, Wang L, Hong B. Butyrate protects against high-  
571 fat diet-induced atherosclerosis via up-regulating ABCA1 expression in apolipoprotein E-  
572 deficiency mice. *Br J Pharmacol* 2020;177:1754–1772. doi:10.1111/bph.14933.
- 573
- 574 55. Karlsson FH, Fåk F, Nookaew I, Tremaroli V, Fagerberg B, Petranovic D, Bäckhed F, Nielsen  
575 J. Symptomatic atherosclerosis is associated with an altered gut metagenome. *Nat Commun*  
576 2012;3:1245. doi:10.1038/ncomms2266.
- 577 56. Denou E, Lolmède K, Garidou L, et al. Defective NOD 2 peptidoglycan sensing promotes

- 578 diet-induced inflammation, dysbiosis, and insulin resistance . EMBO Mol Med 2015;7:259–  
579 274. doi:10.15252/emmm.201404169.
- 580 57. Clarke TB, Davis KM, Lysenko ES, Zhou AY, Yu Y, Weiser JN. Recognition of  
581 peptidoglycan from the microbiota by Nod1 enhances systemic innate immunity. Nat Med  
582 2010;16:228–231. doi:10.1038/nm.2087.
- 583 58. Tosoni G, Conti M, Diaz Heijtz R. Bacterial peptidoglycans as novel signaling molecules from  
584 microbiota to brain. Curr Opin Pharmacol 2019;48:107–113. doi:10.1016/j.coph.2019.08.003.
- 585 59. Baik JE, Jang YO, Kang SS, Cho K, Yun CH, Han SH. Differential profiles of gastrointestinal  
586 proteins interacting with peptidoglycans from *Lactobacillus plantarum* and *Staphylococcus*  
587 *aureus*. Mol Immunol 2015;65:77–85. doi:10.1016/j.molimm.2015.01.007.
- 588 60. Superko HR. Advanced Lipoprotein Testing and Subfractionation Are Clinically Useful.  
589 Circulation 2009;119: 2383–2395. doi:10.1161/CIRCULATIONAHA.108.809582.
- 590  
591  
592  
593  
594  
595  
596  
597  
598  
599  
600  
601  
602  
603  
604  
605  
606  
607  
608  
609

610

611

## 612 **FIGURE LEGENDS**

613

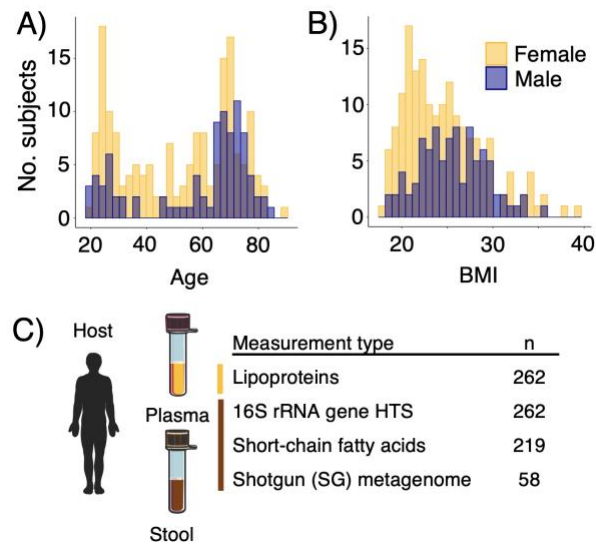

614

615

616 **Figure 1. COUNTERSTRIKE participants and sample overview**

617 **A)** Age and **B)** body mass index (BMI) distribution of the study participants. **C)** samples and  
618 datasets included and analyzed in this study.



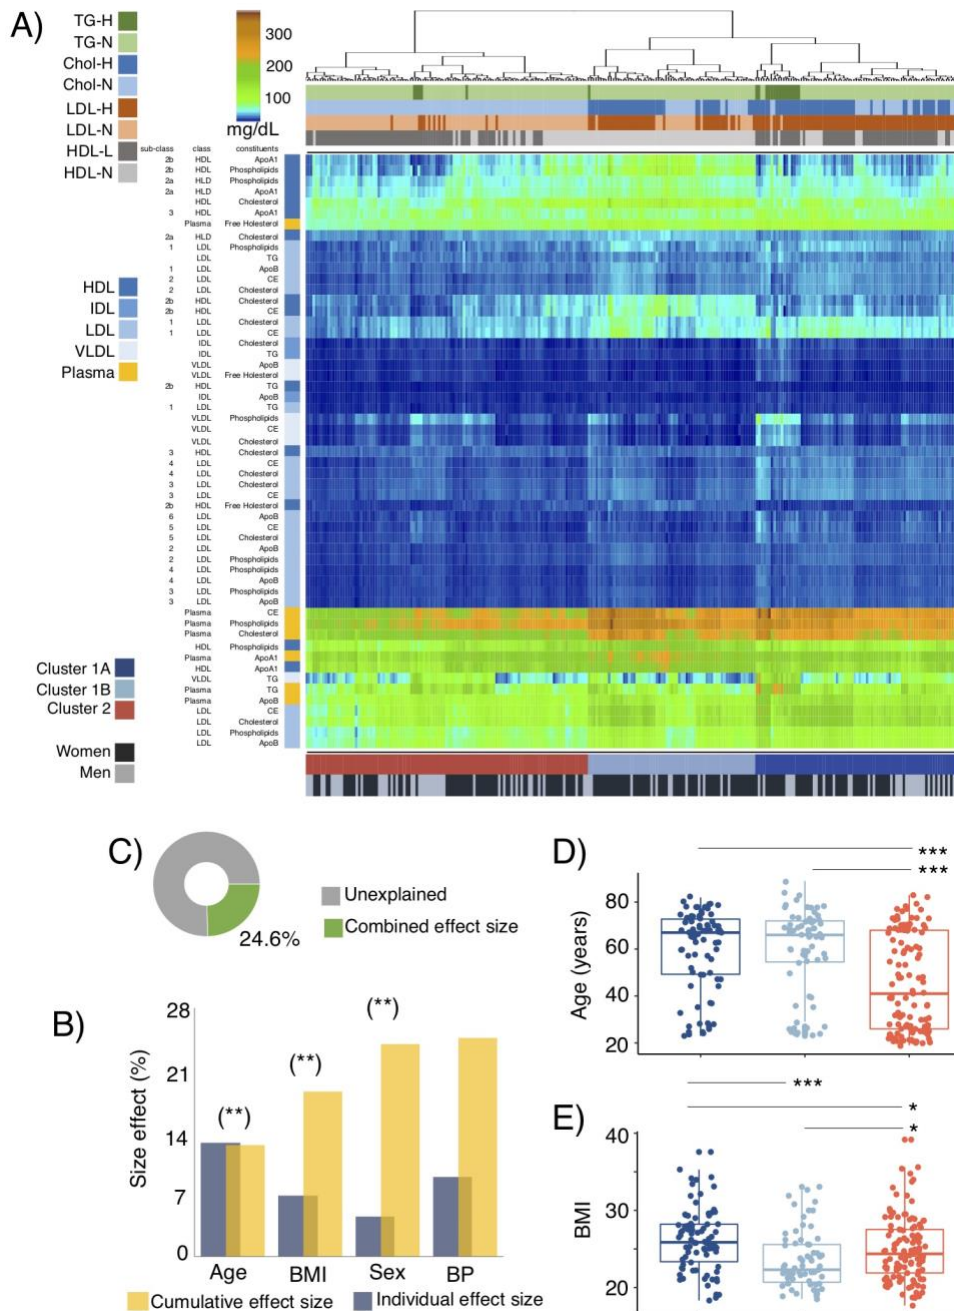

619

620 **Figure 2. Plasma lipoprotein distribution (LPD) profiles and covariates**

621 **A)** Profiles of main and sub-fractions of plasma lipoprotein distribution (LPD) determined by  
 622  $^1\text{H-NMR}$ <sup>6</sup>. LPD are clustered using Euclidean distances and general agglomerative  
 623 hierarchical clustering procedure. Upper color bars represent within-/out- of the  
 624 recommended levels of main lipoprotein fractions suggested by the NIH<sup>40</sup> (total cholesterol  
 625 <200mg/dL, LDL <100mg/dL, HDL >60mg/dL, Triglycerides <150 mg/dL). Lower color  
 626 bars depict 3 clusters (C1A, C1B and C2) of study participants given their LPD profile and  
 627 the sex distribution of subjects. **B)** Cumulative effect size of non-redundant covariates of LPD  
 628 determined by stepwise RDA analysis (right bars) as compared to individual effect sizes  
 629 assuming independence (left bars). **C)** Fraction of LPD variation explained with the stepwise  
 630 approach. Distribution of **D)** age and **E)** body mass index (BMI) between subjects belonging  
 631 to C1A, C1B and C2. Stars show statistical level of significance ( $*p \leq 0.05$ ,  $**p \leq 0.01$ ,  $***P \leq$   
 632  $0.001$ )

633

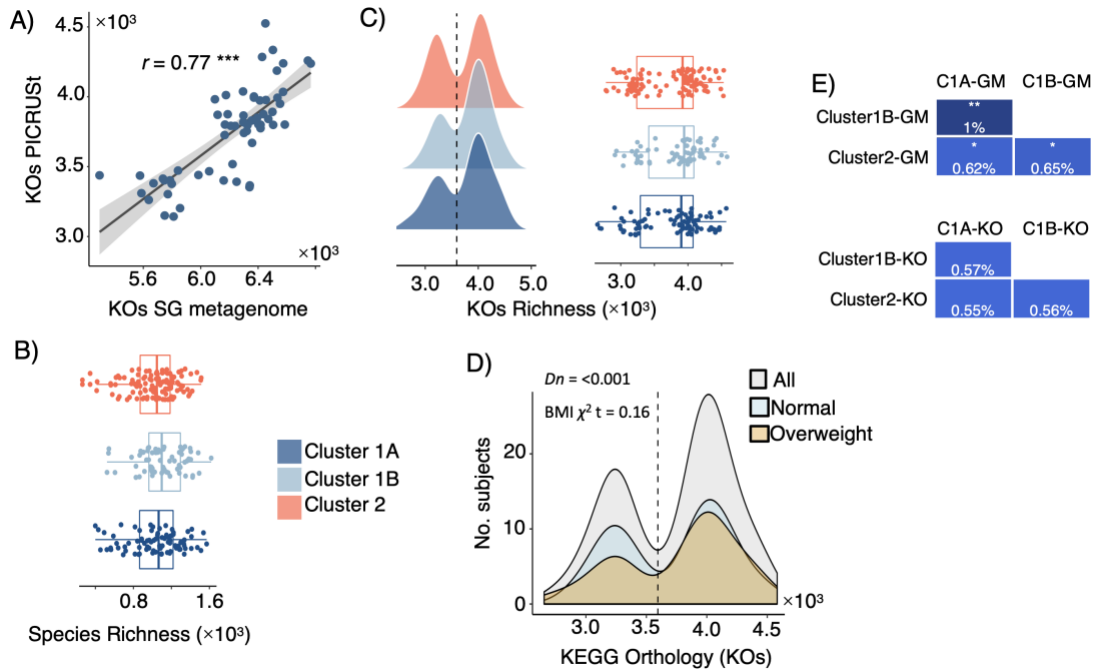

634

635

636 **Figure 3. Diversity metrics on gut microbiota and metabolic content**

637 **A)** Spearman's rank correlation between fecal microbial KEGG Orthologues (KOs) from  
638 shotgun metagenome (SG) sequencing and KO predicted by PICRUSt. **B)** Richness of  
639 microbial phylotypes (zOTUs) richness and **C)** KO predicted by PICRUSt among subjects  
640 catalogued as being C1A, C1B and C2 based on their LPD. **D)** KO counts (richness) among  
641 all subjects and those with BMI  $\leq 25$  (normal) and BMI  $>25$  (overweighed); the observed  
642 bimodal distribution was statistically significant by the dip-test. **E)** Adonis test based on  
643 Canberra dissimilarities quantifying variance explained ( $R^2$ ) and significance of phylotypes  
644 and KO abundance with LPD clustering. Stars show statistical level of significance (\* $p \leq 0.05$ ,  
645 \*\* $p \leq 0.01$ , \*\*\* $P \leq 0.001$ )

646

647

648

649

650

651

652

653

654

655



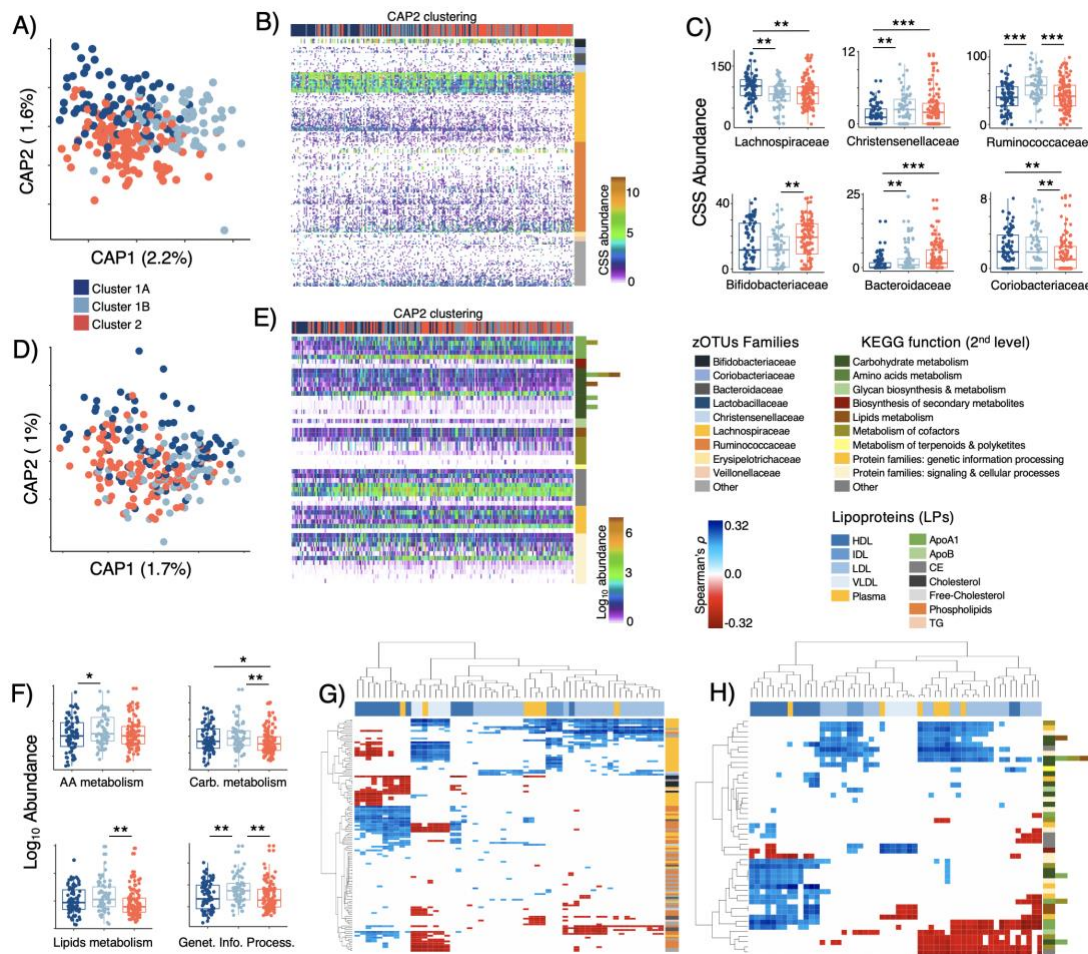

656

657 **Figure 4. Phylotypes and KO functions associated with LPD clustering**

658 Distance-based RDA (Canberra dissimilarity) displaying discrimination of LPD clusters  
 659 based on selected **A)** zOTUs ( $p = 0.001$ , explained variance = 3.8%) and **D)** KOs-PICRUSt ( $p$   
 660 = 0.001, explained variance = 2.7%) selected through Random Forests. Overview of selected  
 661 **B)** zOTUs and **E)** KOs-PICRUSt clustered using Canberra distances and general  
 662 agglomerative hierarchical clustering procedure based on ward2. Distribution of **C)** zOTUs  
 663 summarized to family level and **F)** KOs-PICRUSt summarized to 2<sup>nd</sup> level KEGG function  
 664 across subjects belonging C1A, C1B and C2 LPD groups. Heatmaps displaying significant  
 665 (False Discovery Rate corrected,  $FDR \leq 0.05$ ) Spearman's rank correlations between **G)**  
 666 zOTUs and LPD sub-fractions, as well as **H)** KOs-PICRUSt and LPD sub-fractions. Stars  
 667 show statistical level of significance ( $*p \leq 0.05$ ,  $**p \leq 0.01$ ,  $***P \leq 0.001$ )  
 668

669

670

671

672

673

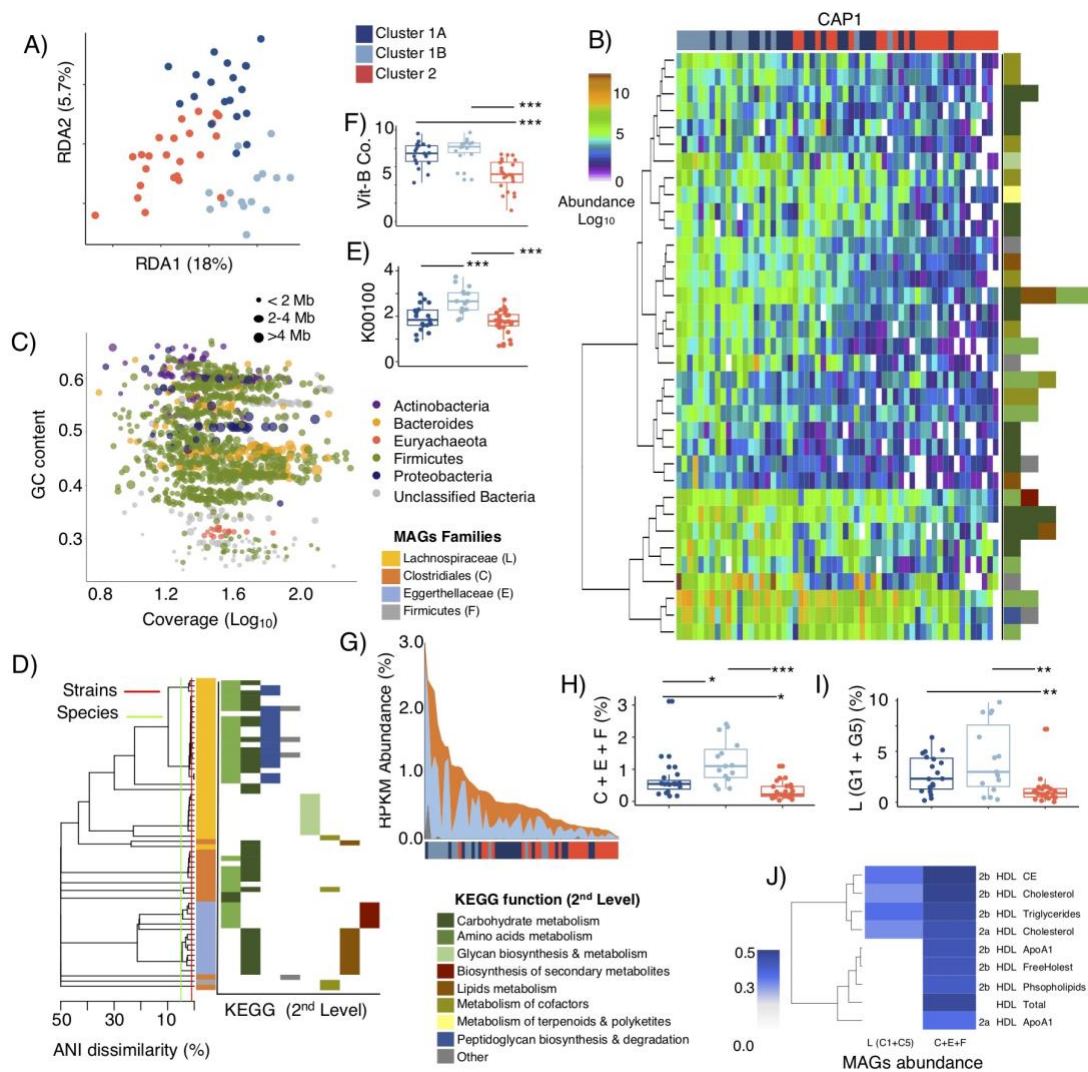

674  
675  
676  
677  
678  
679  
680  
681  
682  
683  
684  
685  
686  
687  
688  
689  
690  
691  
692  
693  
694  
695

**Figure 5. Metagenome metabolic functions and associated MAGs**

**A)** RDA displaying discrimination of LPD clusters based on selected KOs obtained from shotgun metagenome and assembly ( $p = 0.001$ , explained variance = 23.7%). **B)** Overview of most discriminatory (based on CAP1 and CAP2 within db-RDA) KOs with known metabolic functions clustered using Canberra distances and general agglomerative hierarchical clustering procedure based on ward2. **C)** GC-content – Coverage plot of metagenome assembled genomes (MAGs) with  $\leq 10\%$  contamination and  $\geq 70\%$  completeness. MAGs are colored according to phylum-level taxonomic affiliation and bubble size indicates their genome size in mega-bases (Mb). **D)** Phylogeny of MAGs containing KOs that discriminate LPD clusters (1A, 1B and 2), a cut-off of 95-ANI (species-level) and 99-ANI (strain-level) are denoted. MAGs are colored at family level affiliations and their KOs contribution at the 2<sup>nd</sup> level KEGG function pathways are provided. **E)** Relative abundance of protein-encoding genes associated with butanol dehydrogenase (K00100), and **F)** protein-encoding genes associated metabolism and biosynthesis of vitamin B1, B2, B5 and B9. **G-H)** Distribution of cumulative abundance (RPKM) of MAGs (containing discriminatory KOs) associated with Clostridiales, Coriobacteriaceae and Firmicutes (C + Co + F) among LPD clusters. **I)** Distribution of cumulative abundance (RPKM) of MAGs (G1 + G5 – see Figure III-B in the Data Supplement, containing discriminatory KOs) associated with Lachnospiraceae among LPD clusters. **I)** Heatmaps displaying significant (False Discovery Rate corrected, FDR  $\leq 0.05$ ) Spearman's rank correlations between MAGs and HDL subfractions.

696

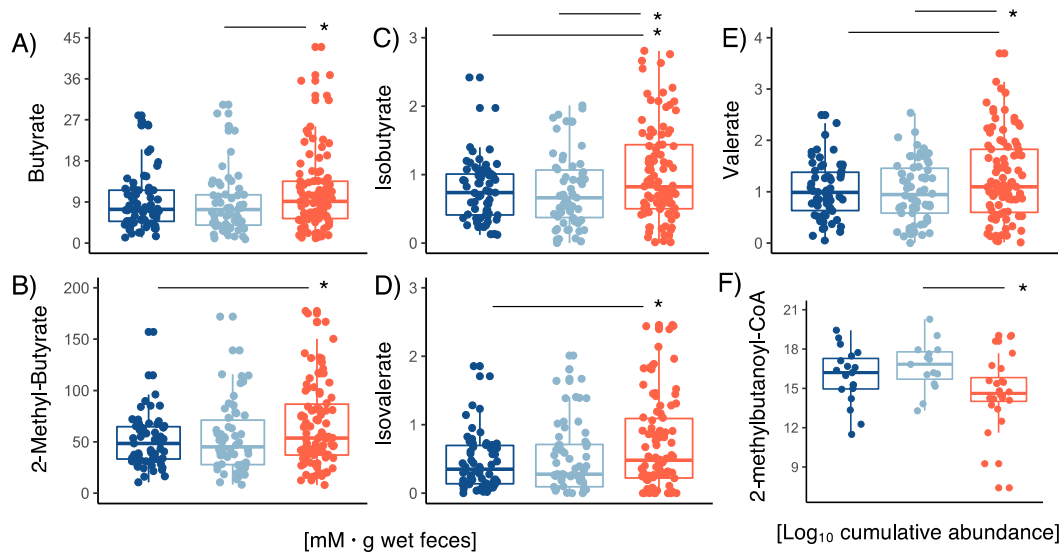

697

698 **Figure 6. Short chain fatty acid concentrations**

699 Range of fecal **A)** butyrate, **B)** 2-methylbutyrate, **C)** isobutyrate, **D)** isovalerate, **E)** valerate  
700 concentrations within the different LPD clusters. Cumulative abundance 2-methylbutanoyl-  
701 CoA genes screened on metagenomes within LPD clusters. Stars show statistical level of  
702 significance ( $*p \leq 0.05$ )

703

704

705

706

707

708

709

710

711

712

713

714

715

716

717
